# Supplementary material
Source: Springer Nature journal article supplement (https://www.springermedizin.de/resource/supplementary/12943_2008_409_MOESM2_ESM.pdf/9554200)
Supplement: MOESM2 [file 9554200]

A

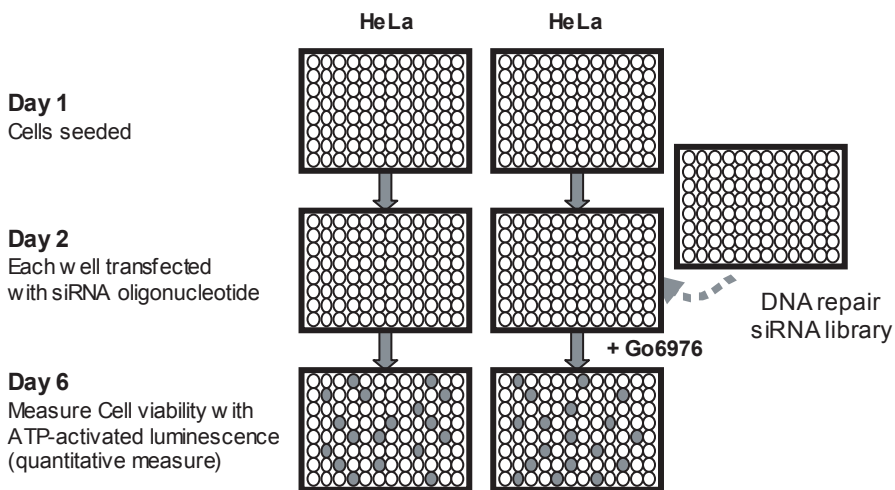

B

| Rank      | Gene target   | Hela + Go6976 / Hela viability | standard dev. |
|-----------|---------------|--------------------------------|---------------|
| <b>1</b>  | <b>RPA2</b>   | <b>0.21</b>                    | <b>0.03</b>   |
| 2         | POLD1         | 0.27                           | 0.05          |
| 3         | HDAC6         | 0.36                           | 0.09          |
| 4         | MSH4          | 0.41                           | 0.03          |
| <b>5</b>  | <b>RPA1</b>   | <b>0.41</b>                    | <b>0.05</b>   |
| 6         | KDEL2         | 0.41                           | 0.16          |
| 7         | PRKDC         | 0.42                           | 0.11          |
| 8         | SNRPE         | 0.42                           | 0.05          |
| 9         | HDAC4         | 0.42                           | 0.07          |
| <b>10</b> | <b>FANCA</b>  | <b>0.42</b>                    | <b>0.09</b>   |
| 11        | RECQ4L        | 0.43                           | 0.09          |
| 12        | HDAC1         | 0.44                           | 0.2           |
| 13        | SET8          | 0.44                           | 0.06          |
| <b>14</b> | <b>FANCC</b>  | <b>0.45</b>                    | <b>0.08</b>   |
| 15        | POLE          | 0.48                           | 0.04          |
| 16        | PAICS         | 0.48                           | 0.06          |
| <b>17</b> | <b>FANCD2</b> | <b>0.48</b>                    | <b>0.14</b>   |
| <b>18</b> | <b>FANCD1</b> | <b>0.49</b>                    | <b>0.08</b>   |
| 19        | FAP           | 0.5                            | 0.07          |
| <b>20</b> | <b>FANCF</b>  | <b>0.5</b>                     | <b>0.07</b>   |
| 21        | ERCC5         | 0.5                            | 0.03          |
| 22        | REV3L         | 0.52                           | 0.13          |
| <b>23</b> | <b>FANCE</b>  | <b>0.52</b>                    | <b>0.07</b>   |
| 24        | TPX2          | 0.52                           | 0.04          |
| 25        | MPG           | 0.53                           | 0.04          |
| <b>26</b> | <b>RPA3</b>   | <b>0.53</b>                    | <b>0.12</b>   |
| 27        | NCBP2         | 0.53                           | 0.06          |
| 28        | RAD23B        | 0.53                           | 0.05          |
| <b>29</b> | <b>FANCG</b>  | <b>0.53</b>                    | <b>0.12</b>   |
| 30        | GTF2H3        | 0.53                           | 0.05          |
|           | GFP           | 0.9                            | 0.04          |
|           | CHK1          | 0.87                           | 0.13          |
